# Supplementary material for: Dynamics of highly concentrated protein solutions around the denaturing transition
Source: Royal Society of Chemistry journal article supplement (doi:10.1039/c1sm06609a), 2011-12-14
Supplement: c1sm06609a.pdf [file c1sm06609a.pdf]

# Supplementary Material: Dynamics of Highly Concentrated Protein Solutions around the Denaturing Transition

Marcus Hennig,<sup>a,b</sup> Felix Roosen-Runge,<sup>b</sup> Fajun Zhang,<sup>b</sup> Stefan Zorn,<sup>b</sup> Maximilian W.A. Skoda,<sup>c</sup> Robert M.J. Jacobs,<sup>d</sup> Tilo Seydel,<sup>\*a</sup> and Frank Schreiber<sup>b</sup>

First published on the web Xth XXXXXXXXXXXX 200X

Here we provide supplementary material for the paper by Hennig *et al.*<sup>1</sup>. We briefly discuss the temperature dependence of  $\langle u^2 \rangle$  upon cooling of a denatured protein solution and provide a table of the apparent diffusion coefficient used to determine the mean-squared displacement of the internal dynamics  $\langle u_{\text{vib}}^2 \rangle + \langle u_{\text{sub}}^2 \rangle$ .

## 1 Cooling of a denatured protein solution

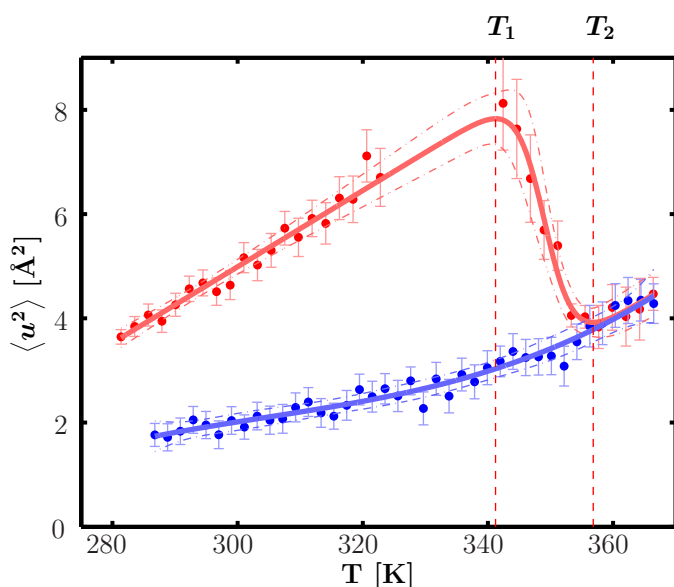

**Fig. 1** Total mean-squared displacement  $\langle u^2 \rangle$  for a 500 mg/ml BSA aqueous solution with 1 M NaCl upon heating from 280 to 370 K with  $8.4 \cdot 10^{-2}$  K/min (red solid line) and cooling back to 280 K with  $12.4 \cdot 10^{-2}$  K/min (blue solid line). The dashed dotted lines denote the 95% confidence intervals of the corresponding fits. The transition regime is denoted by the vertical dashed lines. Note that for the heating process between 324 and 342 K no data was recorded due to an unexpected neutron beam stop during the temperature ramp.

Fig. 1 shows  $\langle u^2 \rangle$  for a 500 mg/ml BSA aqueous solution with 1 M NaCl for two different processes: heating from 280 to 370 K (red solid line) and cooling from 370 back to 280 K (blue solid line). During the heating process we encountered an unexpected loss of the neutron beam between the temperatures 324 and 342 K, hence no data was recorded. Upon heating  $\langle u^2 \rangle$  displays the behavior described in the main paper. Cooling reveals the irreversibility of the denaturing process,

since for  $T < T_2$  the curve progression of  $\langle u^2 \rangle$  is evidently different from the heating curve. Note that at  $T_1$  there is a weak kink indicating a change in the flexibility of the cross-linked network. For cooling we observe a significantly lower  $\langle u^2 \rangle$  which we attribute to the hindered global motion of the proteins due to entanglement and cross-linking. We assume that upon cooling the cross-linked network remains and that the denatured proteins are not ‘disentangled’.

## 2 Temperature Dependent Apparent Diffusion Coefficient

| T[K] | $D$ [Å²/ns] | $\Delta D$ [Å²/ns] |
|------|-------------|--------------------|
| 279  | 0.47        | $\pm 0.26$         |
| 290  | 0.76        | $\pm 0.01$         |
| 300  | 1.23        | $\pm 0.27$         |
| 310  | 1.47        | $\pm 0.39$         |
| 316  | 1.41        | $\pm 0.33$         |
| 319  | 1.81        | $\pm 0.25$         |

**Table 1** Temperature dependence of the apparent diffusion coefficient of BSA in 500 mg/ml aqueous ( $D_2O$ ) solution derived from QENS data recorded at IN10 and IN16.

## References

- 1 M. Hennig, F. Roosen-Runge, F. Zhang, S. Zorn, M. Skoda, R. Jacobs and F. Schreiber, *Soft Matter*, 2011, submitted.

<sup>a</sup> Institut Laue-Langevin, 6 Rue Jules Horowitz B.P. 156, F-38042 Grenoble, France. Tel: +33 476 20 75 79; E-mail: seydel@ill.eu

<sup>b</sup> Universität Tübingen, Institut für Angewandte Physik, Auf der Morgenstelle 10, D-72076 Tübingen, Germany

<sup>c</sup> ISIS, Rutherford Appleton Laboratory, Chilton, Didcot OX11 0QX, UK

<sup>d</sup> Chemistry Research Laboratory, University of Oxford, Oxford OX1 3QZ, UK
